# Supplementary material for: Improved proteomic analysis pipeline for LC-ETD-MS/MS using charge enhancing methods
Source: Royal Society of Chemistry journal article supplement (doi:10.1039/c2mb25106j), 2012-06-14
Supplement: c2mb25106j.pdf [file c2mb25106j.pdf]

## Supplemental materials

# Improved Proteomic Analysis Pipeline for LC-ETD-MS/MS Using Charge Enhancing Methods

Li-Qi Xie† · Cheng-Pin Shen† · Min-Bo Liu · Zhong-Da Chen · Ru-Yun Du · Guo-Quan Yan · Hao-Jie Lu\*  
· Peng-Yuan Yang

Shanghai Cancer Center and Institutes of Biomedical Sciences, Fudan University, Shanghai 200032,

People's Republic of China

† These authors contributed equally to this work

\* To whom correspondence should be addressed. Tel: (086) 021-54237618; Fax: (086)

021-54237961; E-mail: [luhaojie@fudan.edu.cn](mailto:luhaojie@fudan.edu.cn)

**Table S-1.** Threshold for each algorithm when FDR was controlled at 5%.

| FDR5%*          | LCnoD <sup>a</sup> |        | TyNBA <sup>b</sup> |        | TynoD <sup>c</sup> |       |
|-----------------|--------------------|--------|--------------------|--------|--------------------|-------|
|                 | 2+                 | 3+     | 2+                 | 3+     | 2+                 | 3+    |
| <b>Mascot</b>   | -1.375             | -0.575 | -0.95              | -0.2   | -1.1               | -0.25 |
| <b>Sequest</b>  | 1.505              | 1.865  | 2.31               | 2.88   | 1.72               | 1.86  |
| <b>OMSSA</b>    | 1.2                | 0.125  | 1.15               | 1.1    | 0.8                | 0.72  |
| <b>pFind</b>    | -1.915             | -1.635 | -1.5               | -1.475 | -1.82              | -1.34 |
| <b>X!Tandem</b> | -0.025             | -0.145 | 0.04               | -0.225 | 0.07               | 0.04  |

\*Mascot Log10 (E-value), Sequest Xcorr, OMSSA Log10 (E-value), pFind Log10 (E-value) and X!Tandem Log10 (E-value) were used to calculate FDR.

a.LCnoD stands for Lys-C digestion without further derivatization.

b.TyNBA stands for trypsin digestion and m-NBA derivatization.

c.TynoD stands for trypsin digestion without further derivatization.

**Table S-2** Character annotation of AMJ2 data.

|                                   | <b>TynoD</b> | <b>TyNBA</b> | <b>LCnoD</b> |
|-----------------------------------|--------------|--------------|--------------|
| <b>Average Charge</b>             | 2.22         | 2.27         | 2.35         |
| <b>Peptide length<sup>a</sup></b> | 13.10        | 13.51        | 13.60        |
| <b>Average GRAVY Score</b>        | -0.044       | -0.069       | -0.251       |
| <b>Average pI<sup>b</sup></b>     | 4.91         | 4.62         | 6.02         |
| <b>(+)%<sup>c</sup></b>           | 11.9         | 11           | 14.6         |
| <b>(-)%<sup>d</sup></b>           | 13.3         | 13.7         | 14.3         |

a) Number of amino acid residues (peptide length)

b) Average isoelectric point

c) The percentage of positively charged residues

d) The percentage of negatively charged residues

**Table S-3** Charge distribution of precursor ions and the corresponding successful identification rate

(pFind + X!Tandem) of Amj2 data.

|                               | <b>2+</b> | <b>3+</b> | <b>4+</b> | <b>Overall</b> |
|-------------------------------|-----------|-----------|-----------|----------------|
| <b>TynoD</b>                  |           |           |           |                |
| Spectra No.                   | 13090     | 4258      | 502       | 17850          |
| Spectra No.(FDR<5%)           | 7012      | 2002      | 109       | 9123           |
| Successful Identification (%) | 53.57     | 47.01     | 21.7      | 51.11          |
| <b>TyNBA</b>                  |           |           |           |                |
| Spectra No.                   | 13581     | 5245      | 787       | 19506          |
| Spectra No.( FDR<5%)          | 7118      | 2036      | 125       | 9279           |
| Successful Identification (%) | 52.41     | 38.81     | 15.88     | 47.57          |
| <b>LCnoD</b>                  |           |           |           |                |
| Spectra No.                   | 8725      | 5304      | 1722      | 15751          |
| Spectra No.( FDR<5%)          | 4271      | 2323      | 364       | 6958           |
| Successful Identification (%) | 48.95     | 43.80     | 21.14     | 44.17          |

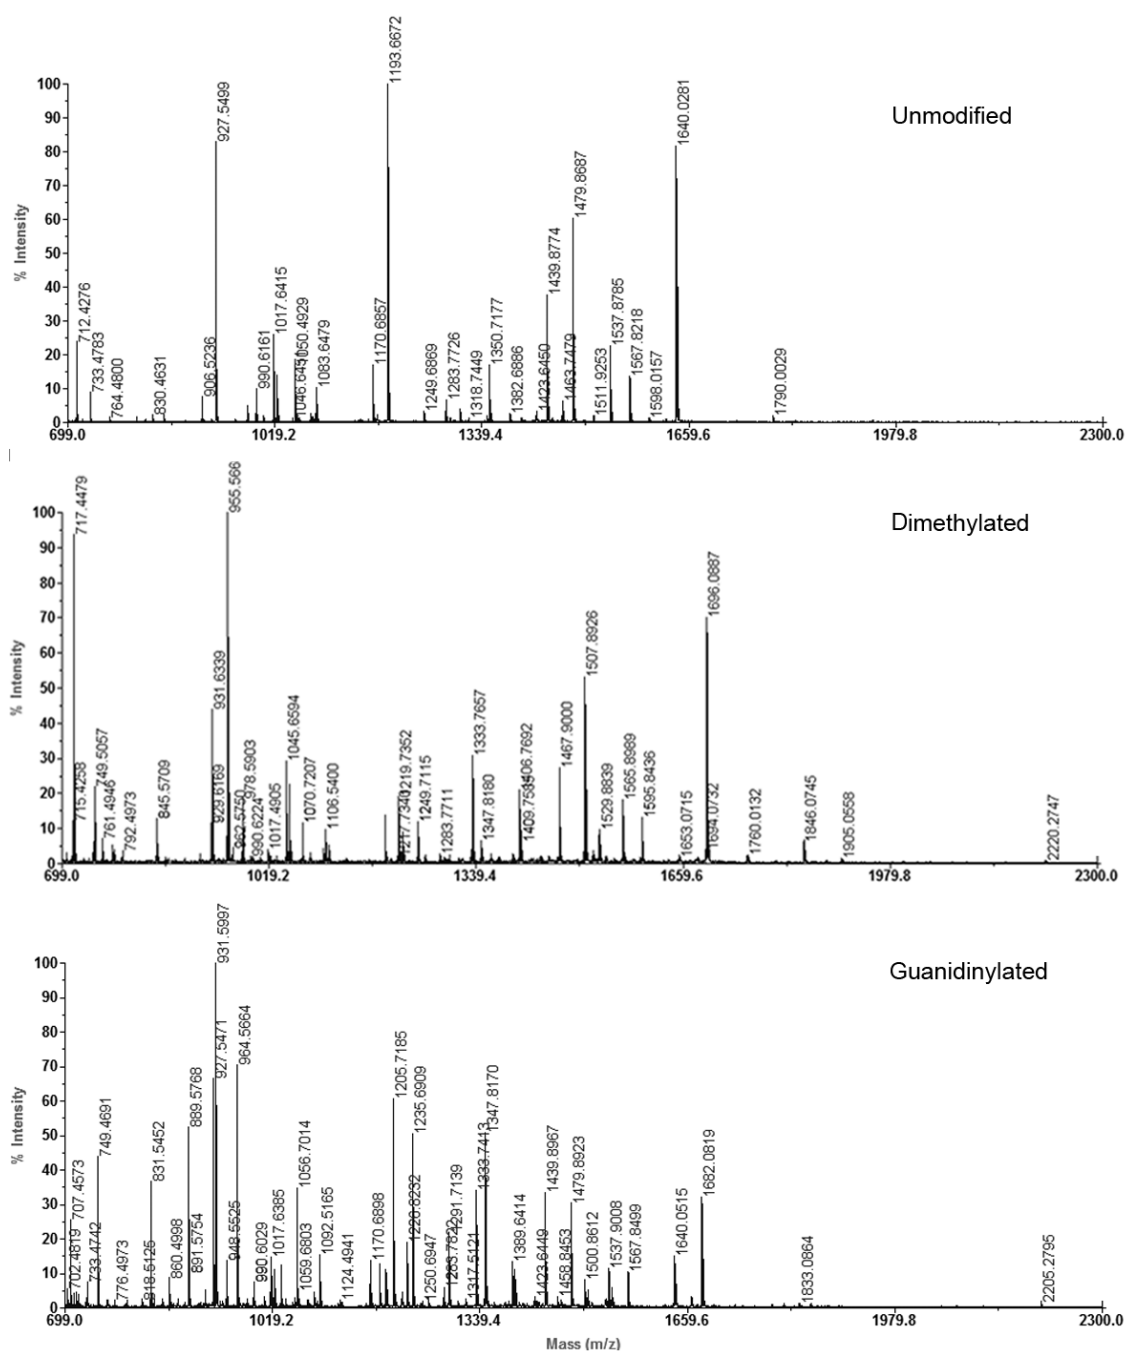

Figure S-1. MS spectra of natural, guanidinated and dimethylated tryptic BSA peptides.

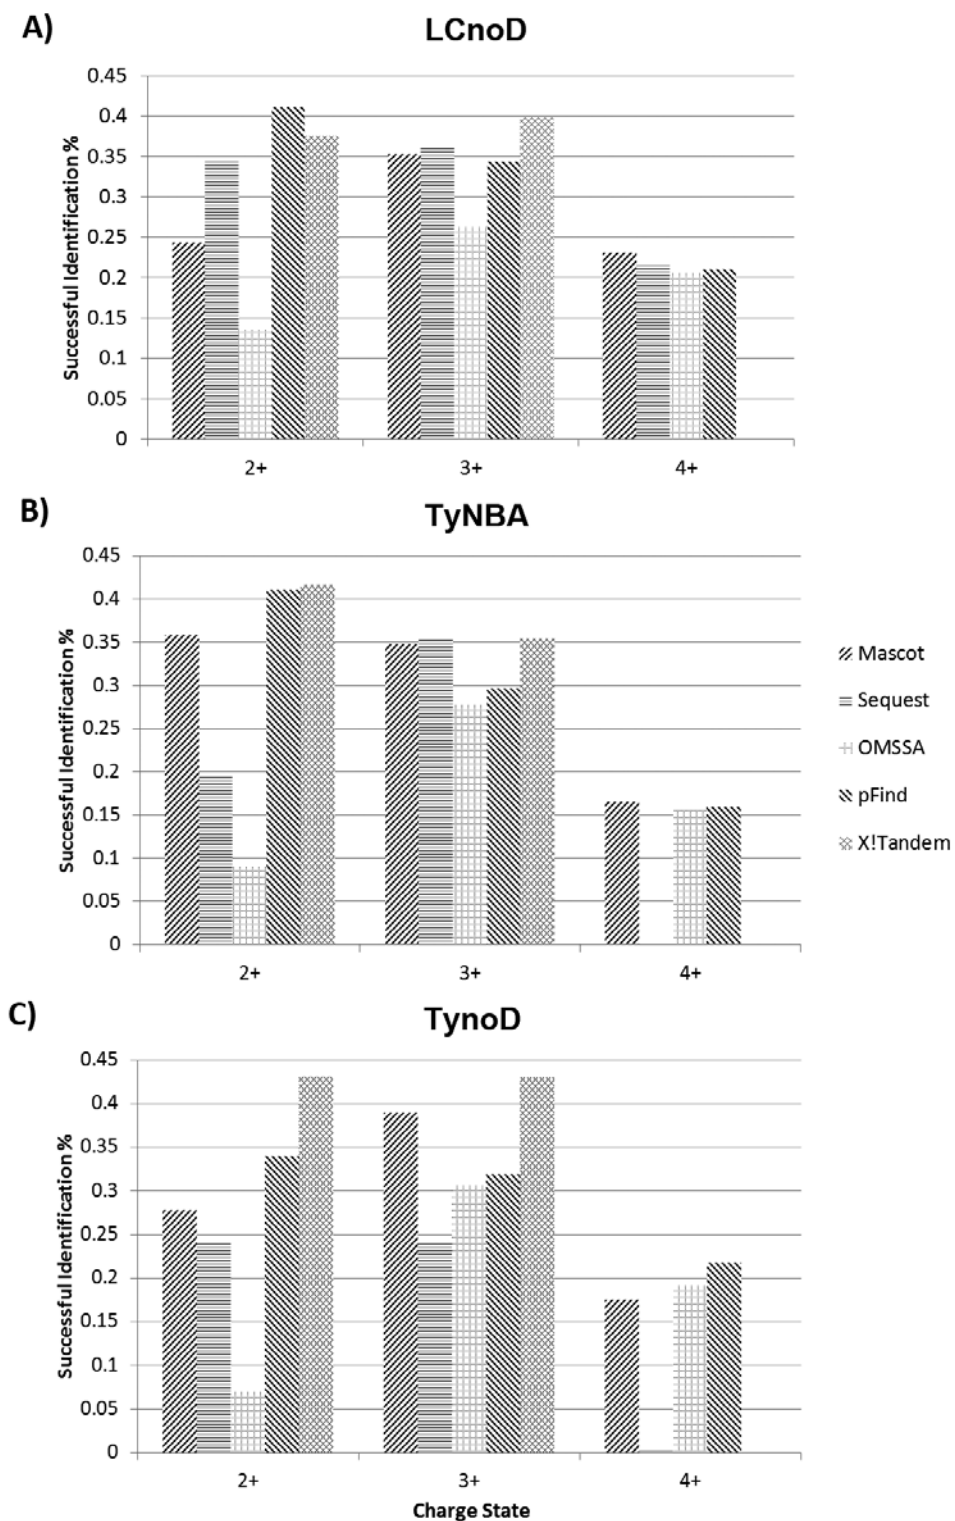

**Figure S-2.** Percentage of successful identification of each charge state for Lys-C (A), *m*-NBA (B) and trypsin (C) strategy. Successful identification ratio was calculated by number of successful identifications dividing by all PSMs.

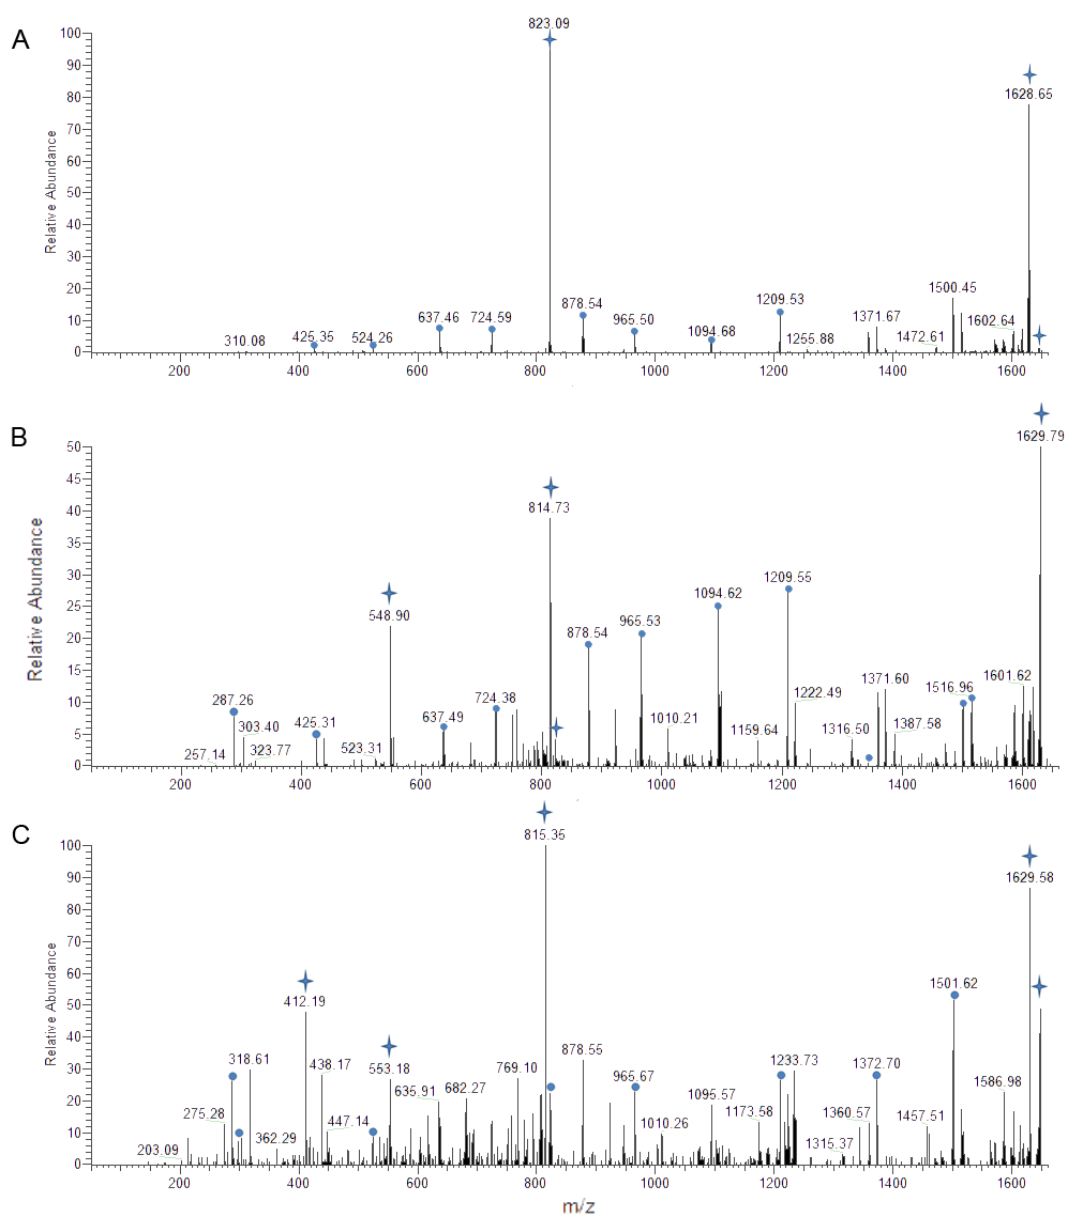

**Figure S-3.** ETD spectra of doubly (A), triply (B) and quadruply (C) charged "K.QEYDESGPSIVHRK.C".

All three spectra with a peptide-prophet score of 1 indicate good data consistency. Four-pointed star indicates peaks belonging to precursor, charge reduced products and neutral loss species are included. Rotundity indicates hydrogen-rearranged fragment ions.
